# Supplementary material for: Different Diets Change the Expression of Bovine Serum Extracellular Vesicle-miRNAs
Source: PubMed Central journal article supplement (PMC6940744; doi:10.3390/ani9121137), 2019-12-13
Supplement: animals-09-01137-s001.pdf [file animals-09-01137-s001.pdf]

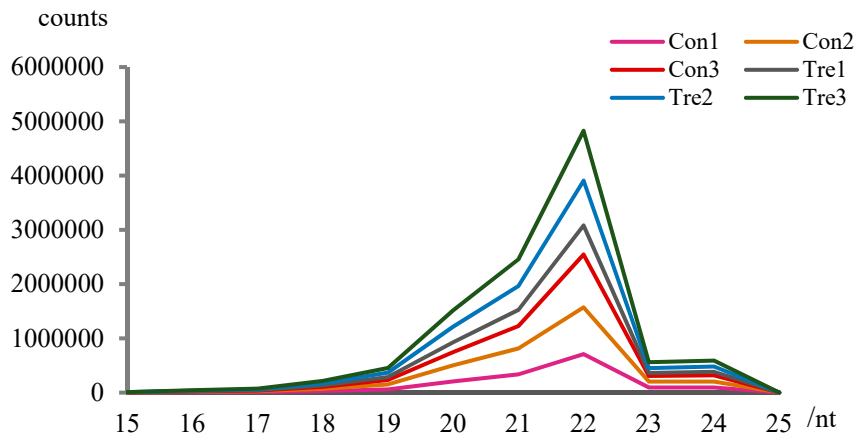

**Supplementary Figure S1.** The length distribution of known miRNAs.
